# Supplementary material for: Development of a light-responsive fluorinated poly(arylene ether) copolymer containing azobenzene groups in the main polymer chain
Source: Royal Society of Chemistry journal article supplement (doi:10.1039/d3me00150d), 2023-11-07
Supplement: d3me00150d1.pdf [file d3me00150d1.pdf]

Supplementary Information

**Development of a light-responsive fluorinated poly(arylene ether) copolymer containing azobenzene groups in the main polymer chain**

Ihor M. Tkachenko\*, Yuriy I. Kurioz, Ruslan M. Kravchuk, Olexandr L. Tolstov, Anatoliy V. Glushchenko, Vassili G. Nazarenko, Valery V. Shevchenko

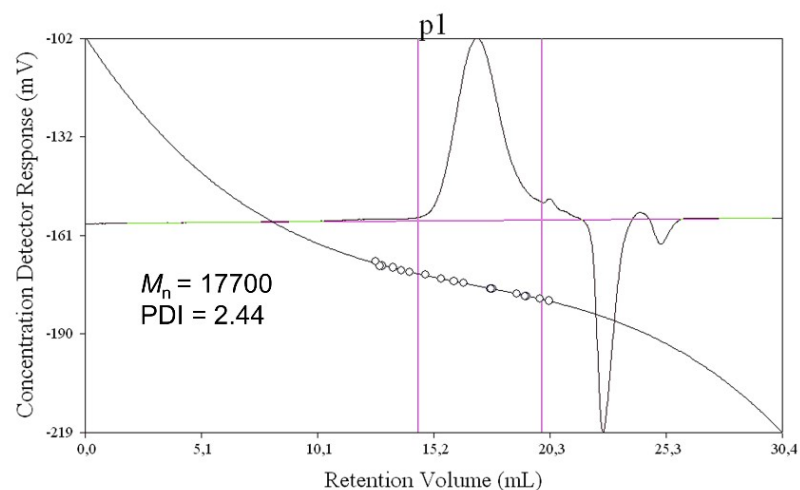

**Figure S1.** The GPC curve of Azo-coFPAE.

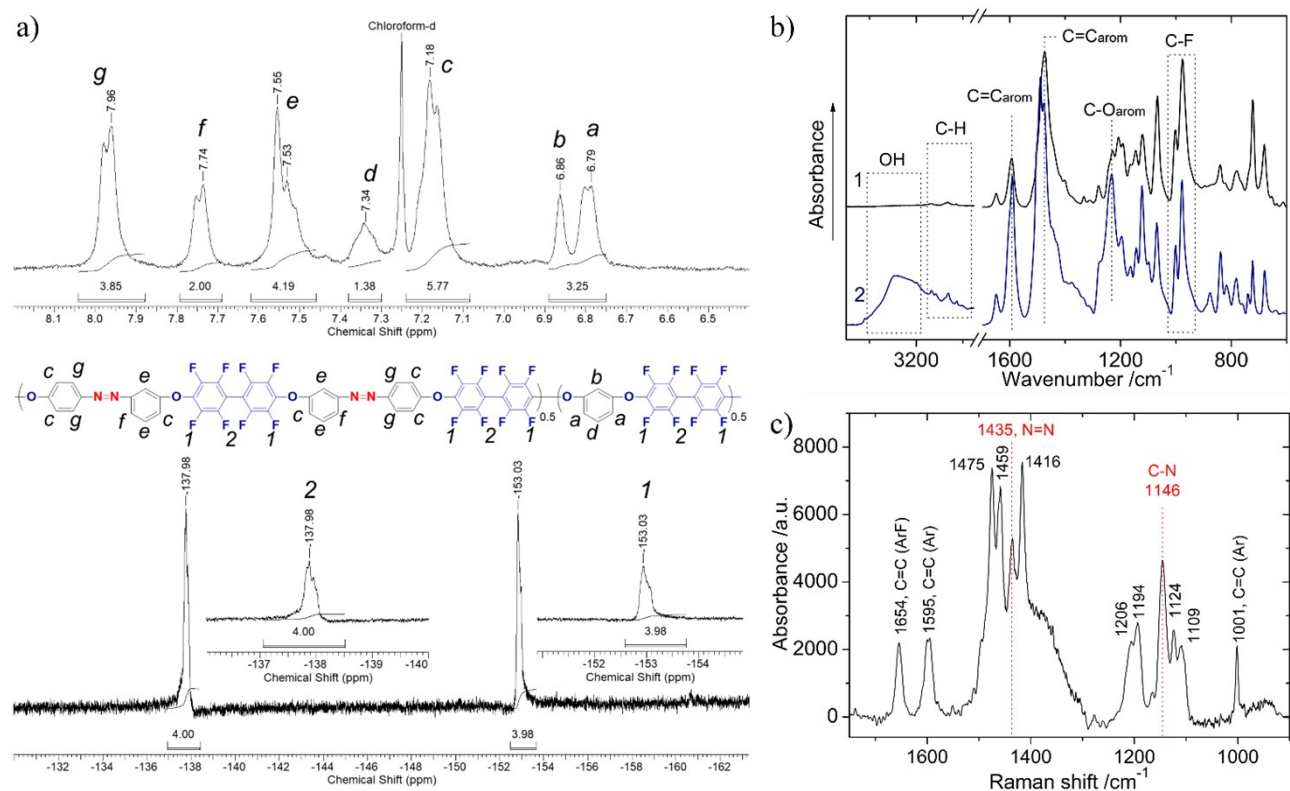

**Figure S2.** (a)  $^1\text{H}$  NMR (top) and  $^{19}\text{F}$  NMR (bottom) spectra of Azo-coFPAE; (b) FTIR spectra of Azo-coFPAE (spectrum 1) and azo-based monomer (spectrum 2); (c) Raman spectrum of Azo-coFPAE.

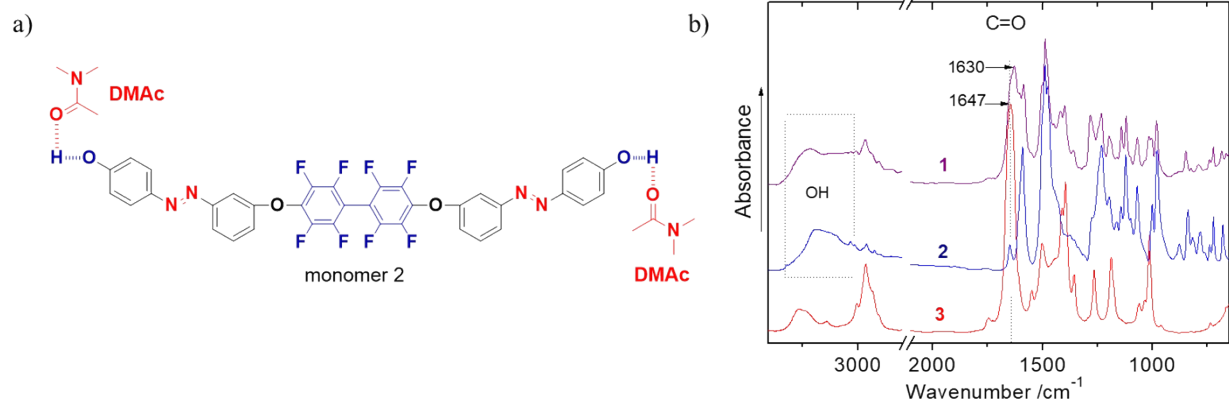

**Figure S3.** a) Hydrogen-bonded complex of monomer **2** and dimethylacetamide (DMAC); b) FTIR spectra of the monomer **2**/DMAC mixture (spectrum 1), azo-based monomer **2** in the solid state (spectrum 2) and pure DMAC (spectrum 3).
